# Supplementary material for: Embedded CdS nanorod arrays in PbS absorber layers: enhanced energy conversion efficiency in bulk heterojunction solar cells
Source: Royal Society of Chemistry journal article supplement (doi:10.1039/c3ra45446k), 2014-01-01
Supplement: c3ra45446k.pdf [file c3ra45446k.pdf]

## Supplementary Information

# Embedded CdS nanorod arrays in PbS absorber layers: Enhanced energy conversion efficiency in bulk heterojunction solar cells

Meiling Sun, Wuyou Fu, Qian Li, Guangchao Yin, Kailin Chi, Jinwen Ma, Lihua Yang, Yannan

Mu, Yanli Chen, Shi Su, Wenjiao Zhang and Haibin Yang\*

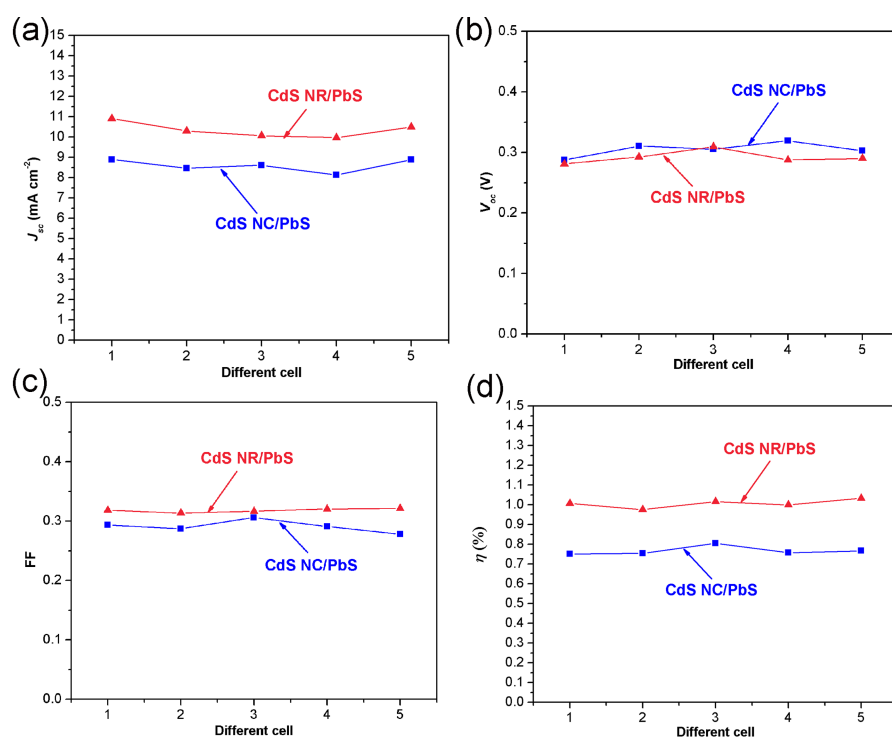

**Fig. S1** Photocurrent density–voltage ( $J$ – $V$ ) parameters of five CdS NR/PbS 3D heterojunction solar cells and five CdS NC/PbS planar heterojunction solar cells.
